# Supplementary material for: A nanozyme-reinforced injectable photodynamic hydrogel for combating biofilm infection
Source: Royal Society of Chemistry journal article supplement (doi:10.1039/d3tb01688a), 2023-01-01
Supplement: d3tb01688a1.pdf [file d3tb01688a1.pdf]

## Supplementary information

### **Nanozyme-Reinforced Injectable Photodynamic Hydrogel for Combating Biofilm Infection**

Junqing Zhang<sup>a</sup>, Shuang Zhao<sup>a</sup>, Shen Zhang<sup>a</sup>, Hao Zhu<sup>a</sup>, Yaoxin Zhang<sup>a</sup>, Linpei Li<sup>a</sup>,  
Chaoqun Liu<sup>\*a,b</sup>, Jiahua Shi<sup>\*a</sup>

<sup>a</sup> School of Pharmacy, Key Laboratory of Natural Medicine and Immune-Engineering of Henan Province, Henan University, Kaifeng, 475004, P. R. China.

<sup>b</sup> Department of Pharmacy, the First Affiliated Hospital of Henan University, Kaifeng, 475001, P. R. China.

E-mail: cqliu@henu.edu.cn, sjiahua@henu.edu.cn

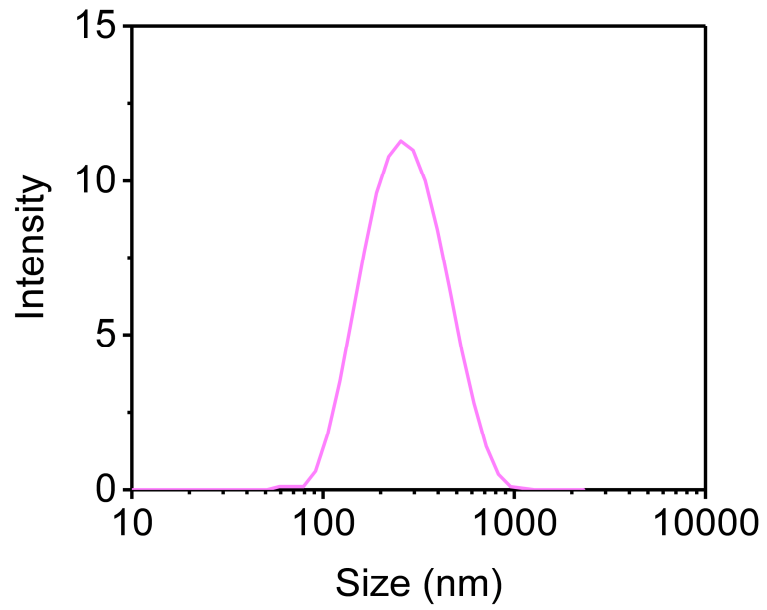

**Fig. S1** Size distribution of MnO<sub>2</sub> NS.

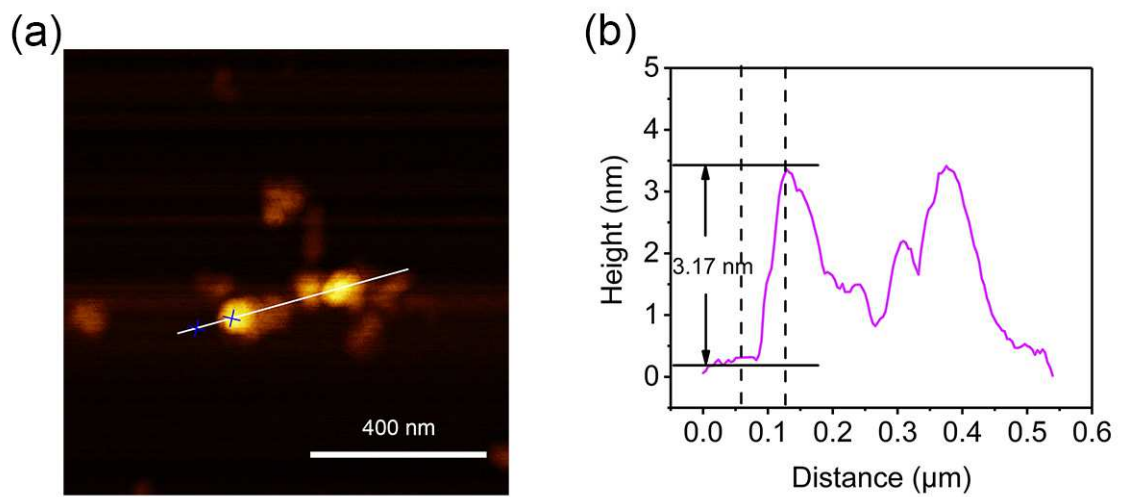

**Fig. S2** AFM image (a) and corresponding height image (b) of MnO<sub>2</sub> NS dispersed on mica substrate.

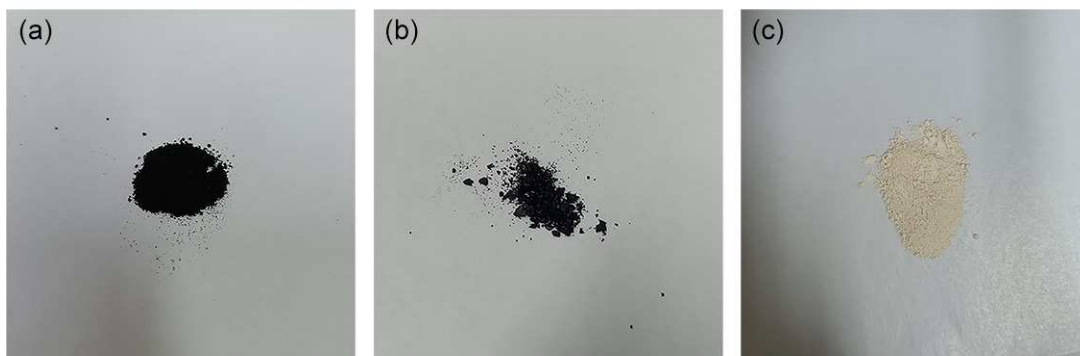

**Fig. S3** Digital photos of (a)  $\text{MnO}_2$  NS (b)  $\text{MnO}_2$ -TCPP and (c)  $\text{CaO}_2$  NP solid freeze-dried powder samples.

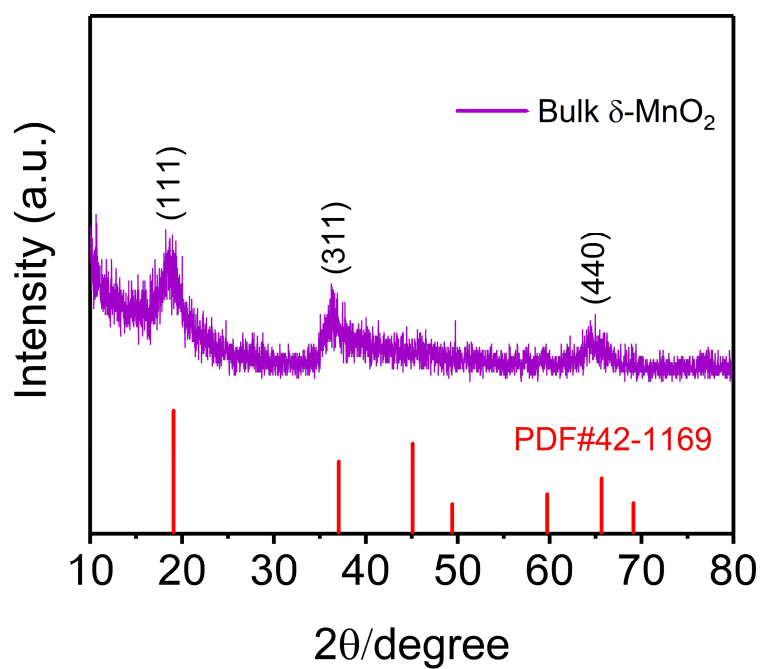

**Fig. S4** XRD pattern of bulk  $\delta\text{-MnO}_2$ .

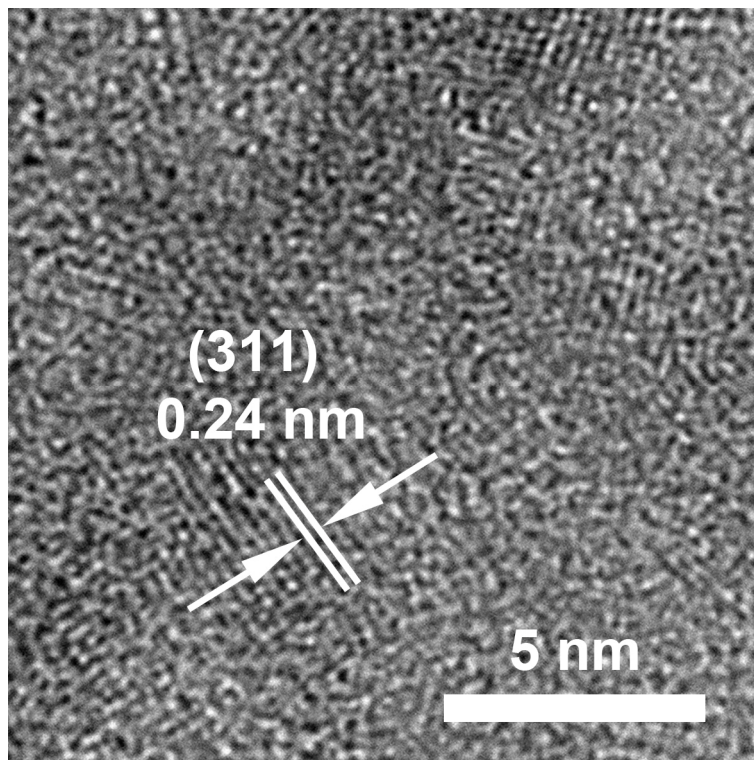

**Fig. S5** HRTEM image of MnO<sub>2</sub> NS.

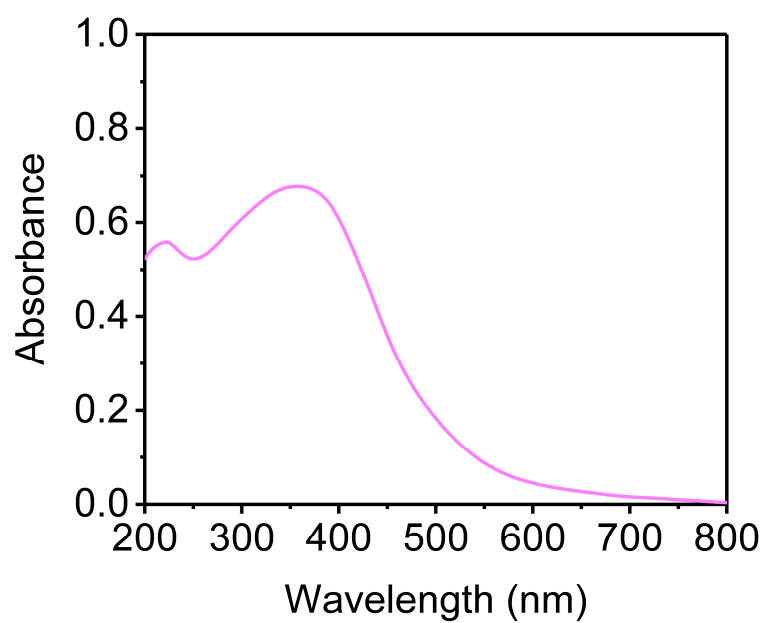

**Fig. S6** UV-Vis-NIR spectrum of MnO<sub>2</sub> NS.

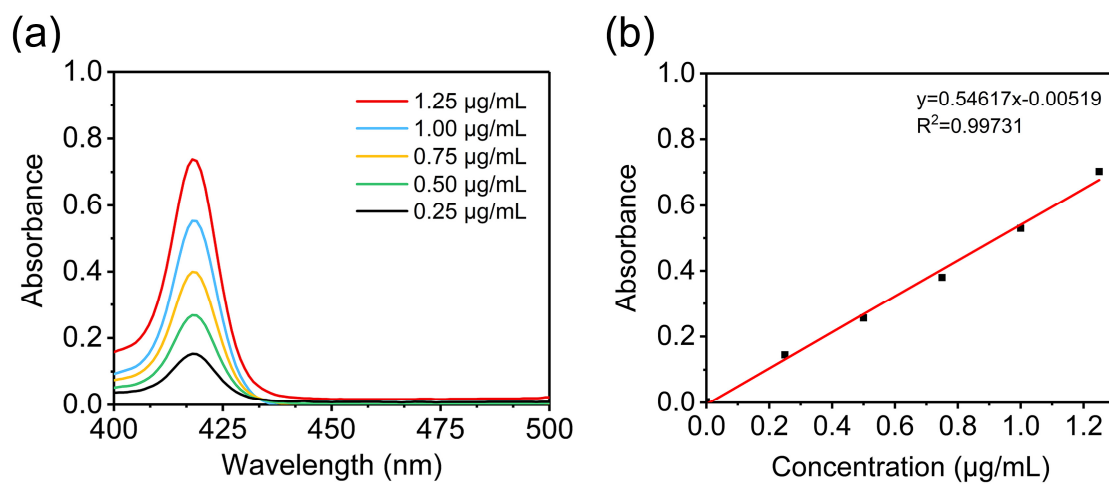

**Fig. S7** (a) The absorbance curve of TCPP at various concentration. (b) The standard curve of TCPP was obtained from the absorbance at 419 nm.

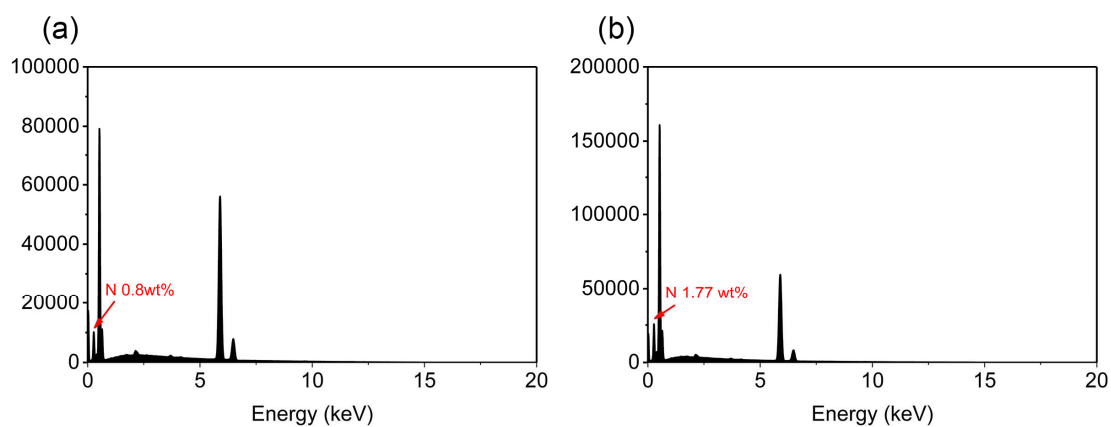

**Fig. S8** EDS spectra of (a) MnO<sub>2</sub> NS and (b) MnO<sub>2</sub>-TCPP.

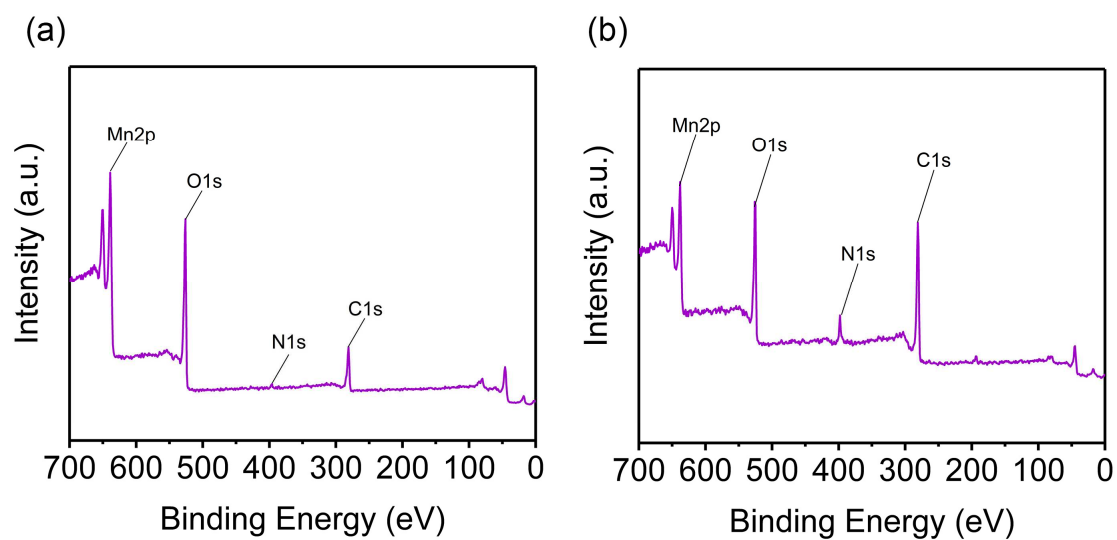

**Fig. S9** XPS spectra of (a) MnO<sub>2</sub> NS and (b) MnO<sub>2</sub>-TCPP.

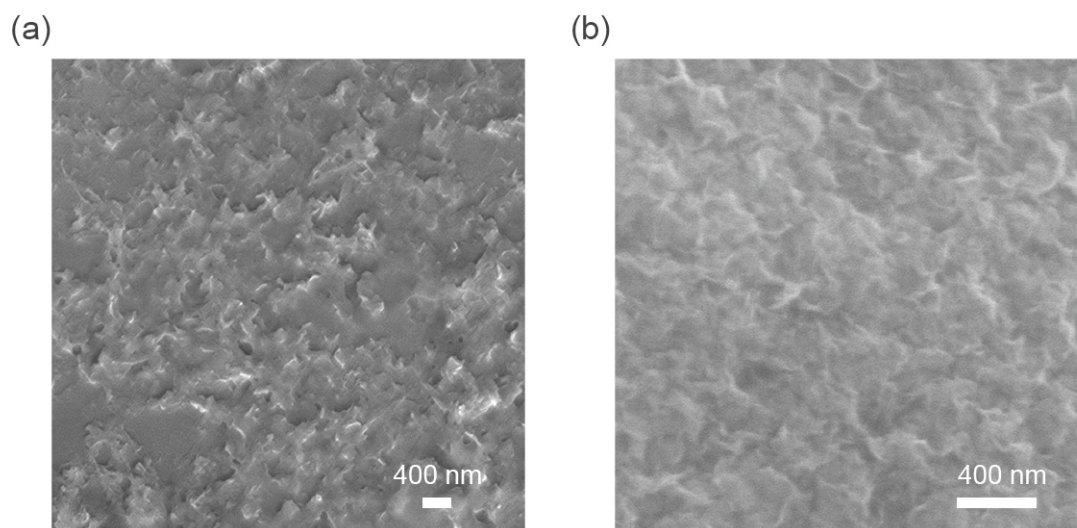

**Fig. S10** SEM images of (a) MnO<sub>2</sub> NS and (b) MnO<sub>2</sub>-TCPP.

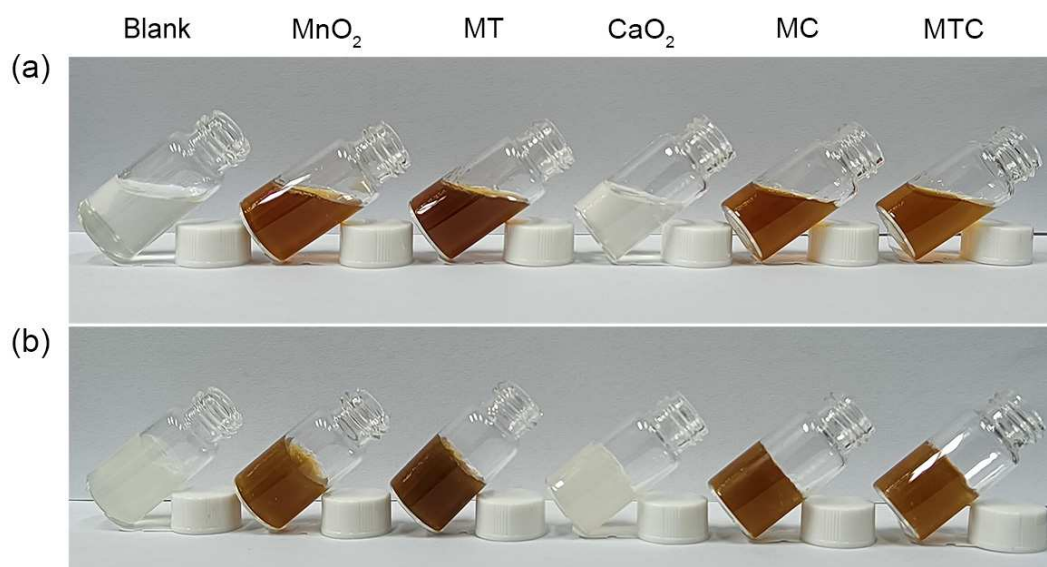

**Fig. S11** Digital images of the sol-gel phase transition process for the preparation of MTC gel (doped with MnO<sub>2</sub>-TCPP and CaO<sub>2</sub> NP). Photographs of process for the preparation of MTC hydrogels (a) before and (b) after adding the calcium ions.

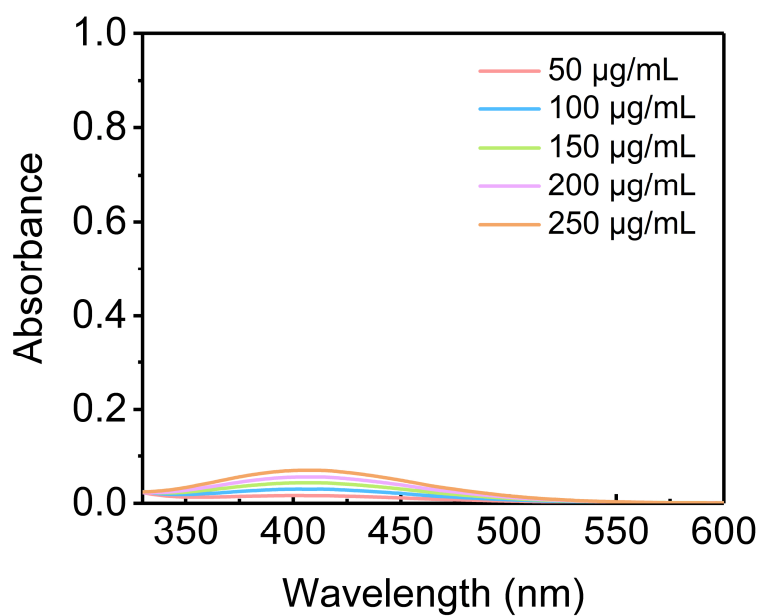

**Fig. S12** H<sub>2</sub>O<sub>2</sub> produced from various concentration of CaO<sub>2</sub> NP at pH 7.4 for 6 h.

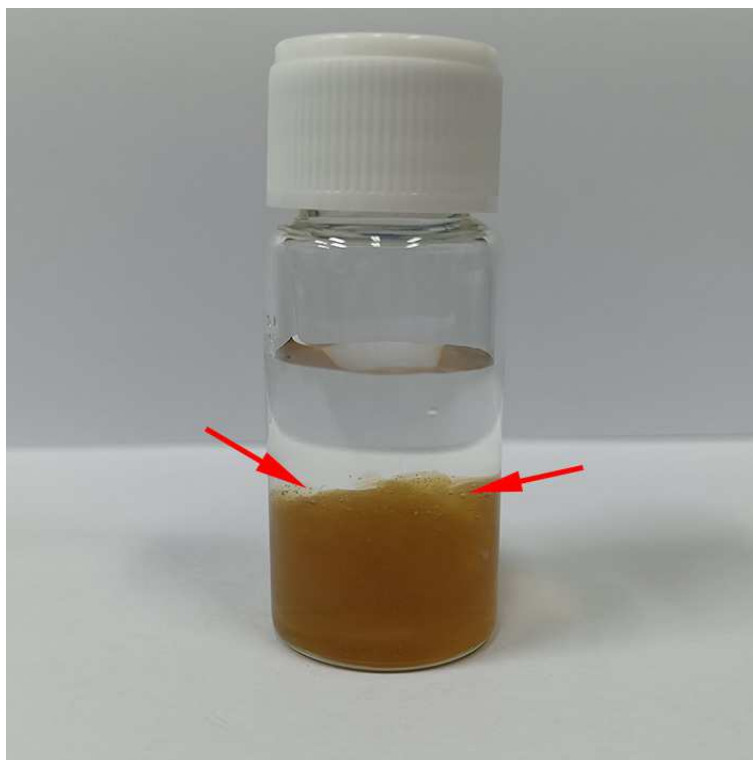

**Fig. S13** Digital image of oxygen bubbles generated by MTC gel at 10 min. Red arrows showed some bubbles.

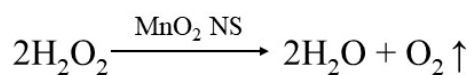

*Initiation:*

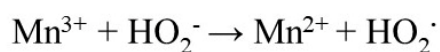

*Chain propagation:*

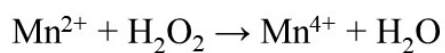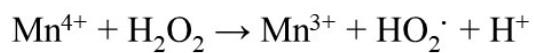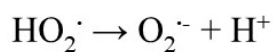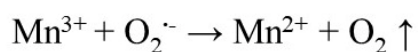

*Chain termination:*

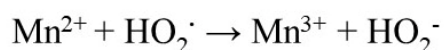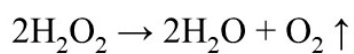

**Fig. S14** The catalytic mechanism of MnO<sub>2</sub> NS as a catalase mimic to produces oxygen.



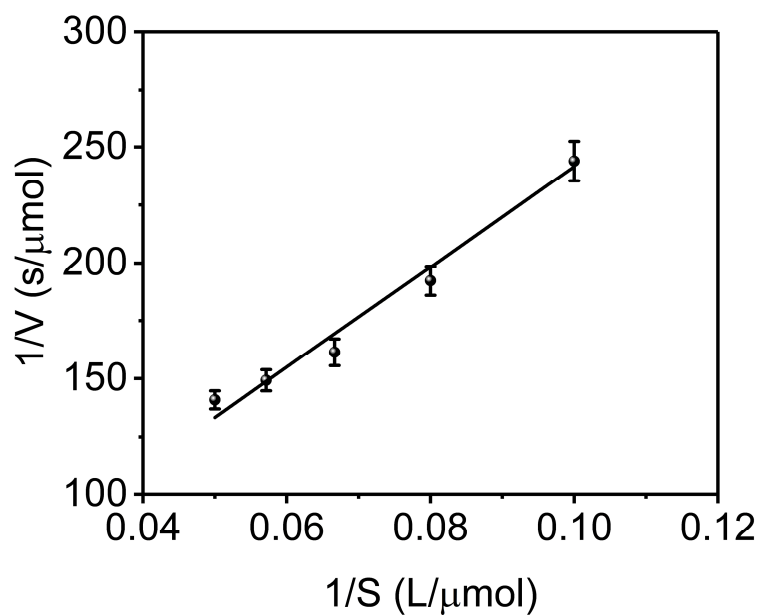

**Fig. S15** Steady-state kinetic assay with 100  $\mu\text{g}/\text{mL}$   $\text{MnO}_2$  NS. Lineweaver-Burk plot of CAT-like activity of  $\text{MnO}_2$  NS in the presence of various concentrations of  $\text{H}_2\text{O}_2$ .

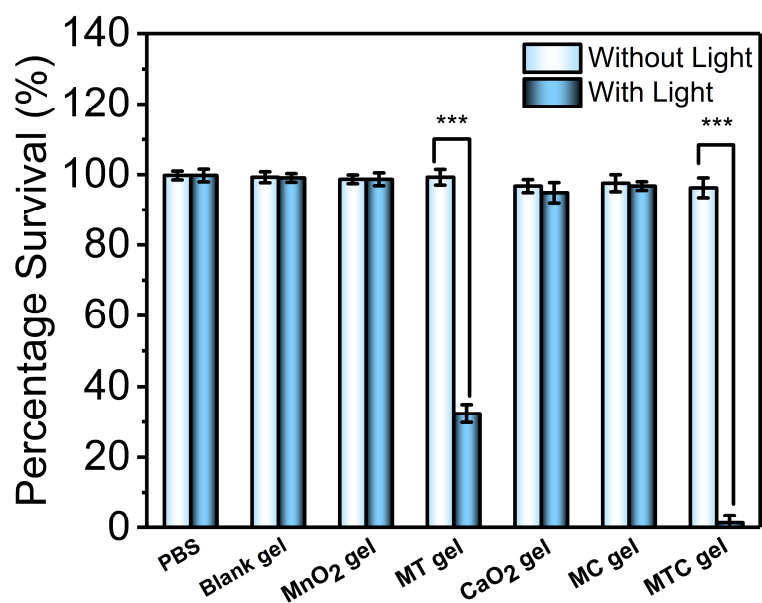

**Fig. S16** Bacterial viability of *E. coli* after treating with Blank gel,  $\text{MnO}_2$  gel, MT gel,  $\text{CaO}_2$  gel, MC gel, MTC gel with or without Light ( $0.65 \text{ W}/\text{cm}^2$ , 10 min,  $n = 3$ ,  $*P < 0.05$ ,  $**P < 0.01$ ,  $***P < 0.001$ ).

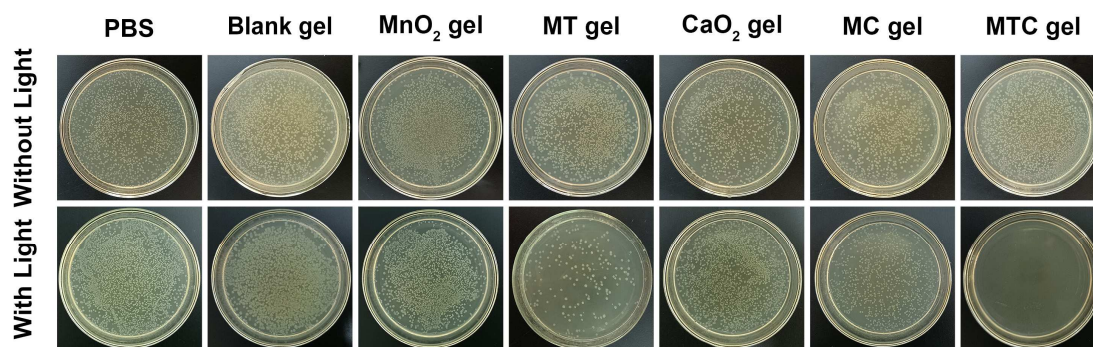

**Fig. S17** Colonies of *E. coli* cultured on agar plates after various treatments.

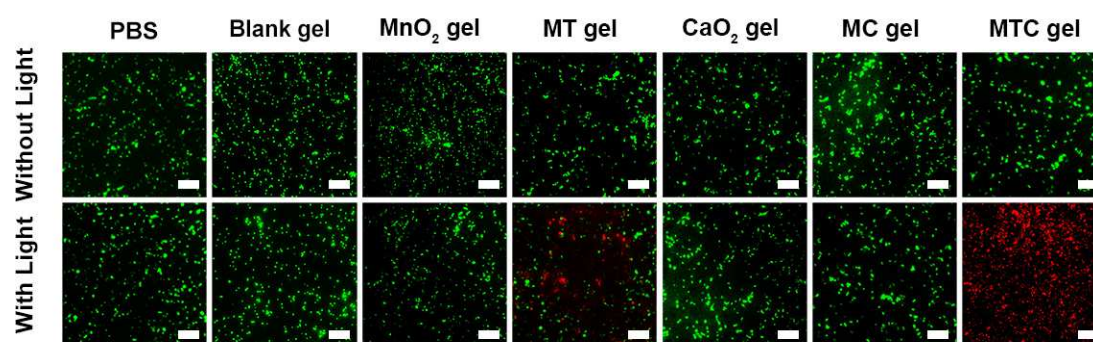

**Fig. S18** Live/dead fluorescence images of *E. coli* stained by FDA (green, viable bacteria) and PI (red, dead bacteria) after various treatments. Scale bar: 20  $\mu$ m.

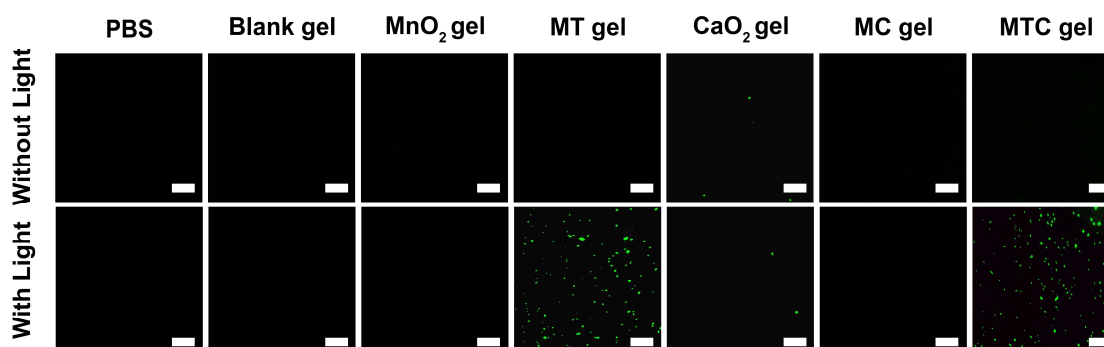

**Fig. S19** Intracellular ROS fluorescence images (green) of *E. coli* stained by DCFH-DA after various treatments. Scale bar: 20  $\mu$ m.

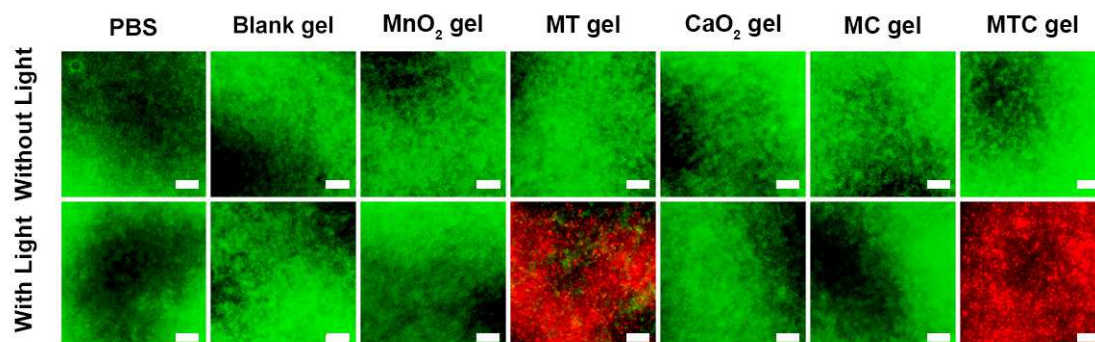

**Fig. S20** Live/dead fluorescence images of *S. aureus* stained by FDA (green, viable bacteria) and PI (red, dead bacteria) after various treatments. Scale bar: 20  $\mu\text{m}$ .

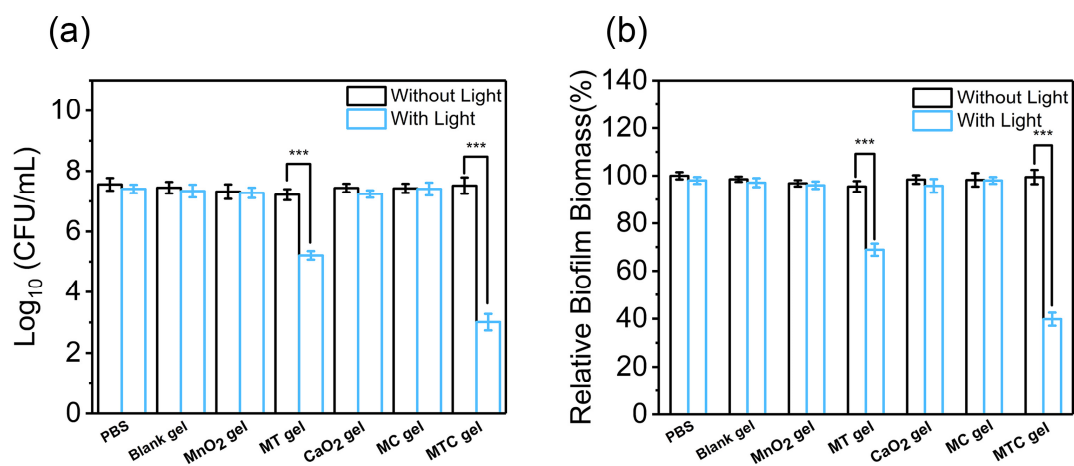

**Fig. S21** (a) Numbers of viable *E. coli* in biofilms after various treatments. (b) Relative biofilm biomass of *E. coli* biofilm after various treatments ( $n = 3$ ,  $*P < 0.05$ ,  $**P < 0.01$ ,  $***P < 0.001$ ).

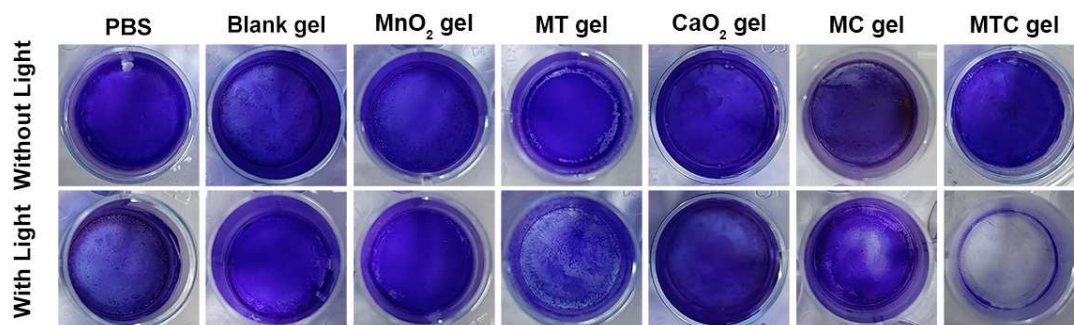

**Fig. S22** Photographs of *E. coli* biofilm stained by crystal violet after various treatments.

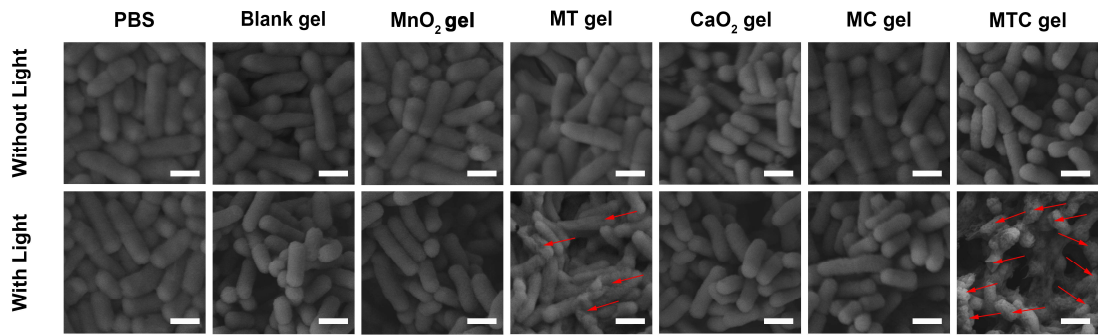

**Fig. S23** SEM images of *E. coli* biofilm after various treatments. Red arrows show morphological damage of bacteria in biofilm. Scale bar: 1  $\mu\text{m}$ .

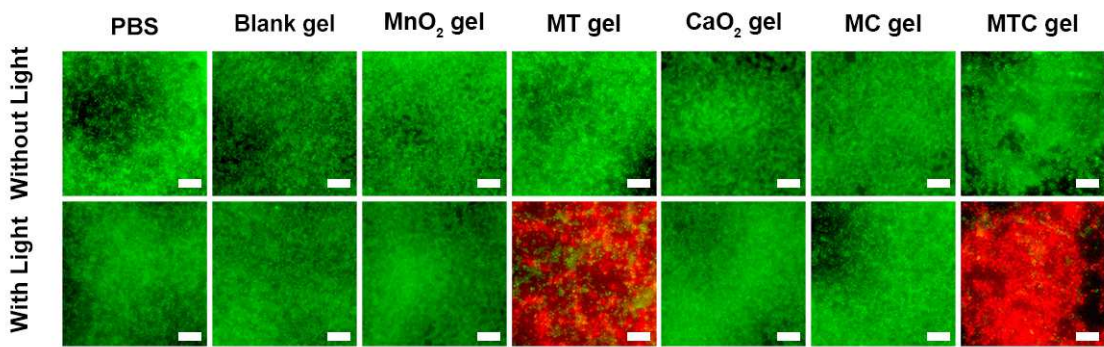

**Fig. S24** Live/dead fluorescence images of *E. coli* biofilm stained by FDA (green, viable bacteria) and PI (red, dead bacteria) after various treatments. Scale bar: 20  $\mu\text{m}$ .

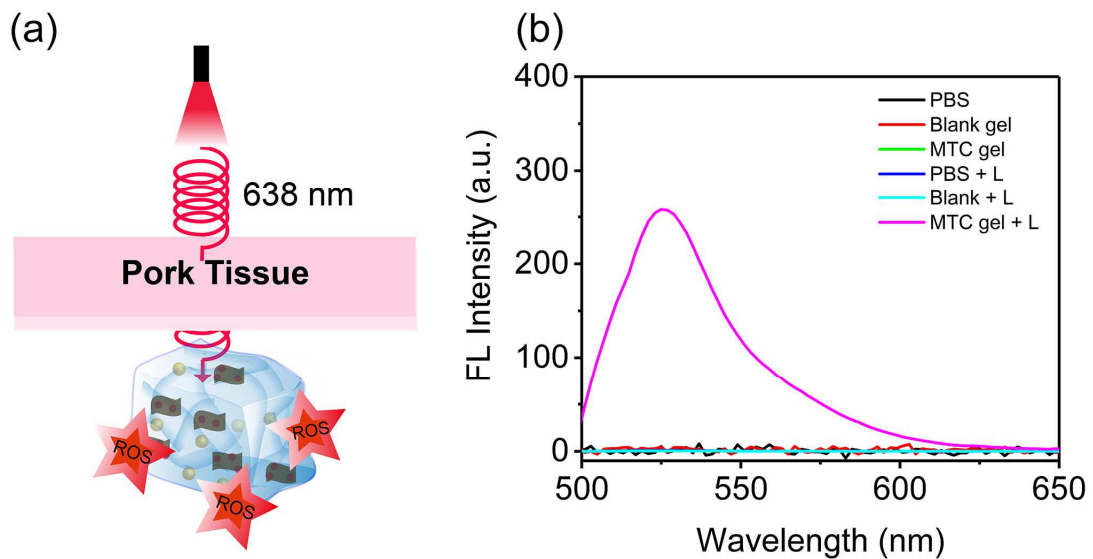

**Fig. S25** (a) Illustration of in-deep tissue irradiation using 1 mm of pork tissue. (b) Fluorescence spectrum of DCF after treating with various groups through 1 mm of pork tissue with or without 638 nm light irradiation ( $0.65 \text{ W/cm}^2$ , 600 s).

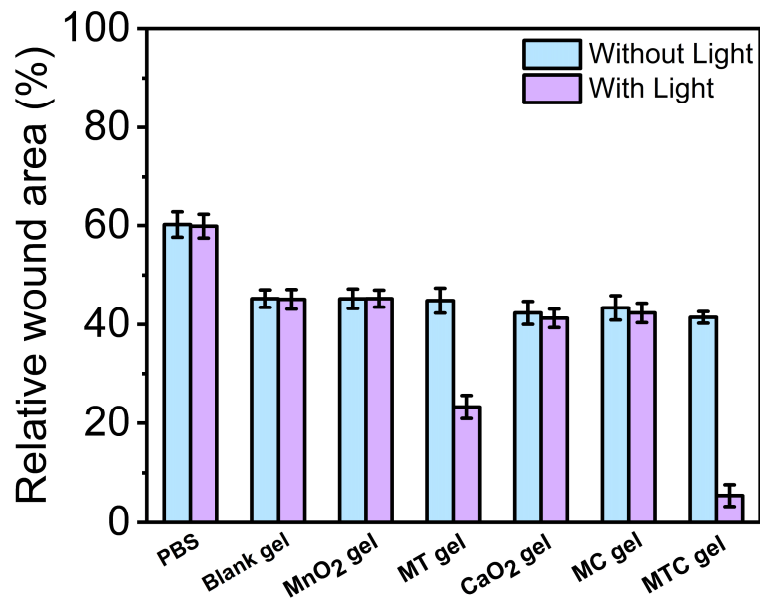

**Fig. S26** Relative infected wound areas after a 12 days post-treatment (n=5).

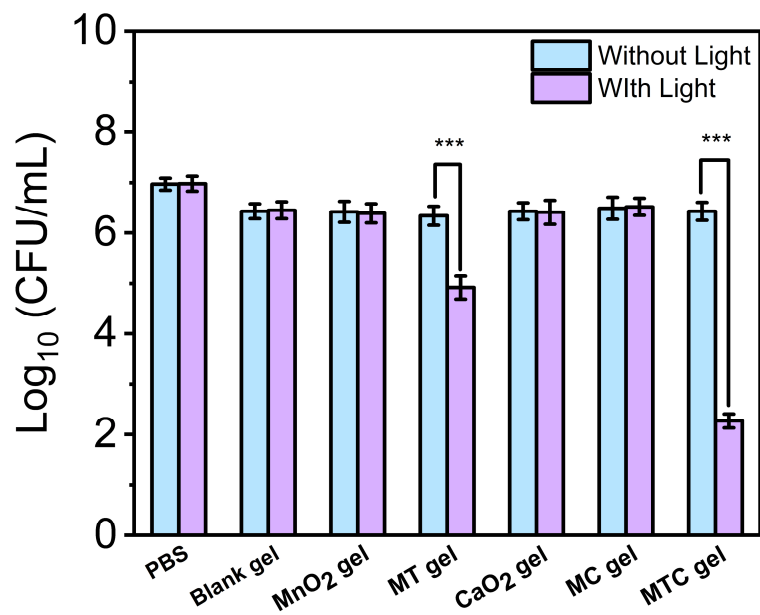

**Fig. S27** Bacterial viability from biofilm-infected tissues after a 12 days post-treatment (n = 3, \* $P < 0.05$ , \*\* $P < 0.01$ , \*\*\* $P < 0.001$ ).

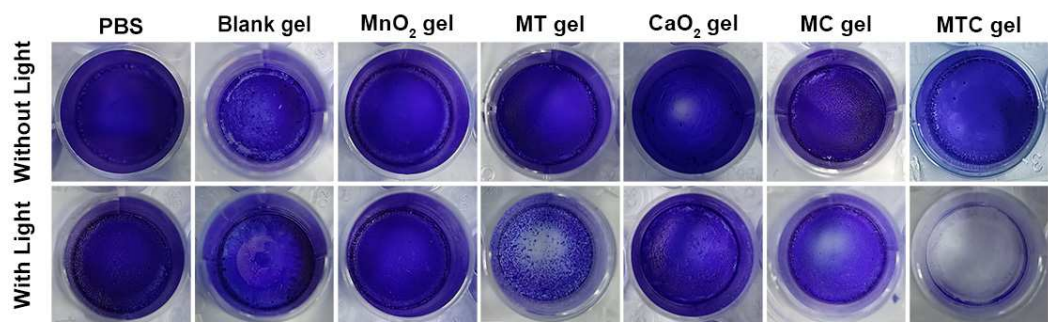

**Fig. S28** Photographs of various stained biofilm of wound tissue rinsed by ethanol and placed in a 24-well plate.

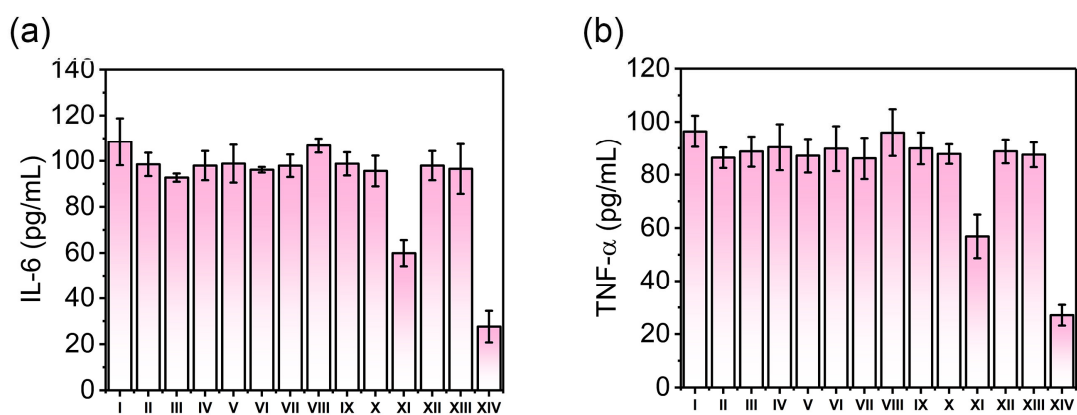

**Fig. S29** Inflammation level assessment *in vivo* with ELISA detection of inflammation markers (IL-6 (a) and TNF- $\alpha$  (b)) after different treatments. (I) PBS, (II) Blank gel, (III) MnO<sub>2</sub> gel, (IV) MT gel, (V) CaO<sub>2</sub> gel, (VI) MC gel, (VII) MTC gel, (VIII) PBS + Light, (IX) Blank gel + Light, (X) MnO<sub>2</sub> gel + Light, (XI) MT gel + Light, (XII) CaO<sub>2</sub> gel + Light, (XIII) MC gel + Light and (XIV) MTC gel + Light (n=3).

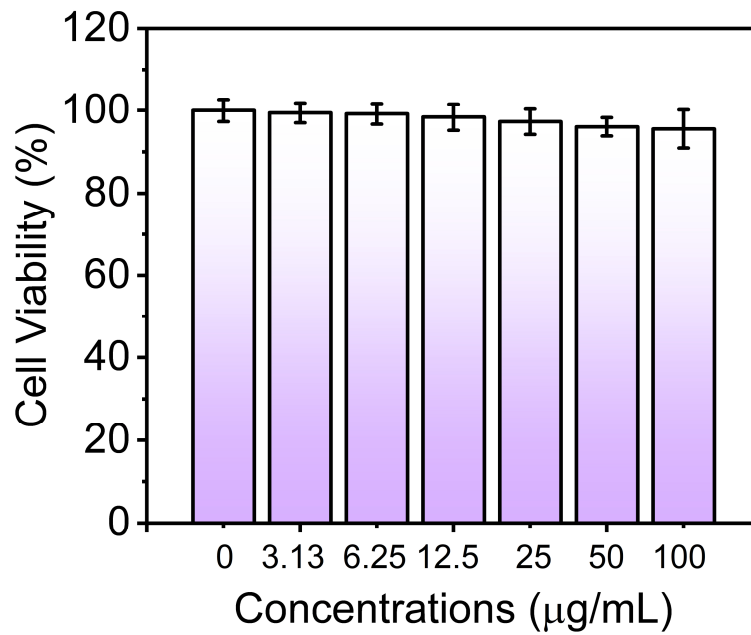

**Fig. S30** The cell cytotoxicity of L929 cells after incubating with the leachate from MTC gel (containing different content of MnO<sub>2</sub>-TCPP) for 4 h (n=3).

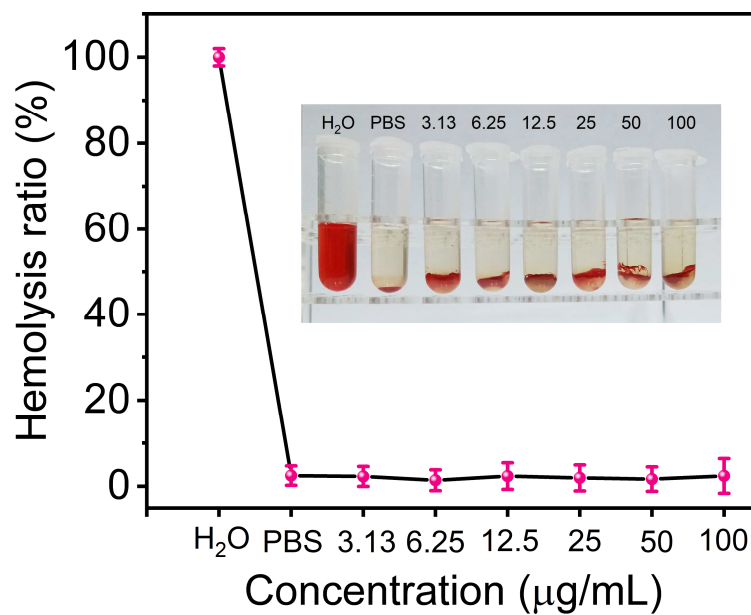

**Fig. S31** Hemolysis ratio of RBC after incubating with water, PBS or hydrogels containing different concentrations of MnO<sub>2</sub>-TCPP. The concentrations of MnO<sub>2</sub>-TCPP are 3.13, 6.25, 12.5, 25, 50 and 100 µg/mL, respectively (n =3).

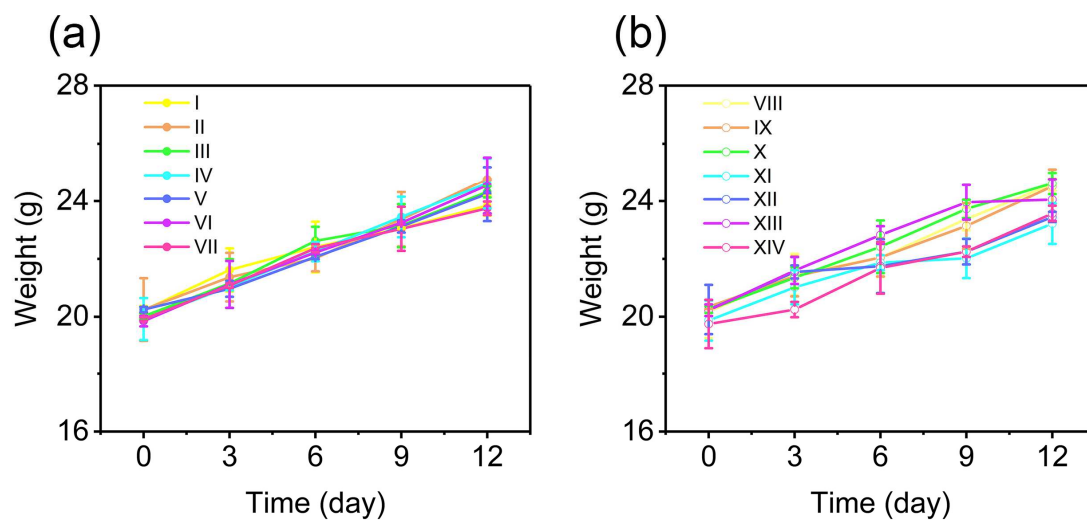

**Fig. S32** Body weight changes of mice in different treatment groups. (a) (I)PBS, (II) Blank gel, (III) MnO<sub>2</sub> gel, (IV) MT gel, (V) CaO<sub>2</sub> gel, (VI) MC gel, (VII) MTC gel. (b) (VIII) PBS + Light, (IX) Blank gel + Light, (X) MnO<sub>2</sub> gel + Light, (XI) MT gel + Light, (XII) CaO<sub>2</sub> gel + Light, (XIII) MC gel + Light and (XIV) MTC gel + Light (n =5, \**P* < 0.05, \*\**P* < 0.01, \*\*\**P* < 0.001).
